# Supplementary material
Source: Springer Nature journal article supplement (https://www.springermedizin.de/resource/supplementary/12948_2011_104_MOESM2_ESM.pdf/9556960)

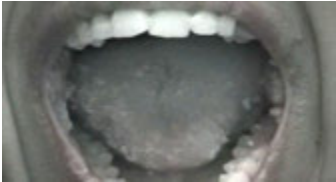

Supplement: MOESM2 [file 9556960]
